# Supplementary material for: Phenotypic and Genotypic Characteristics of Antimicrobial Resistance in Citrobacter freundii Isolated from Domestic Ducks (Anas platyrhynchos domesticus) in Bangladesh
Source: MDPI journal article supplement (doi:10.3390/antibiotics12040769), 2023-04-17
Supplement: s1 [file s1]

# Phenotypic and genotypic characteristics of antimicrobial resistance in *Citrobacter freundii* isolated from domestic ducks (*Anas platyrhynchos domesticus*) in Bangladesh

Tarana Ahmed <sup>1,2,\*</sup>, Md. Saiful Islam <sup>1</sup>, Najmul Haider <sup>3,4</sup>, Linzy Elton <sup>5</sup>, Badrul Hasan <sup>6</sup>, Mohammad Nuruzzaman <sup>7</sup>, Md. Tanvir Rahman <sup>1</sup>, S.M. Lutful Kabir <sup>1</sup>, Md. Shahidur Rahman Khan <sup>1,\*</sup>

<sup>1</sup>Department of Microbiology and Hygiene, Bangladesh Agricultural University, Mymensingh 2202, Bangladesh; dvm41257@bau.edu.bd (M.S.I.); tanvirahman@bau.edu.bd (M.T.R.); lkabir79@bau.edu.bd (S.M.L.K.).

<sup>2</sup>Department of Livestock Services, Ministry of Fisheries & Livestock, Government of the Peoples Republic of Bangladesh, Krishi Khamar Sarak, Farmgate, Dhaka-1215, Bangladesh.

<sup>3</sup>School of Life Sciences, Keele University, Staffordshire, United Kingdom; n.haider@keele.ac.uk (N.H.).

<sup>4</sup>The Royal Veterinary College, University of London, Hertfordshire, United Kingdom.

<sup>5</sup>Centre for Clinical Microbiology, Department of Infection, Division of Infection and Immunity, Royal Free Campus, University College London, London, UK; Linzy.Elton@ucl.ac.uk (L.E.)

<sup>6</sup>Department of Jobs, Precincts and Regions, AgriBio, Centre for AgriBioscience, Bundoora, Victoria, 3083, Australia; badrul.hasan@agriculture.vic.gov.au (B.H.)

<sup>7</sup>Ministry of Public Administration, Dhaka- 1205, Bangladesh; mnzaman27@gmail.com (M.N.)

**\*Correspondence:** tarana\_ahmed07@yahoo.com (T.A.) and msrkhan001@yahoo.com (M.S.R.K.)

**Supplementary Table S1:** Pearson correlation coefficients assessing correlation between pairs of antibiotics to which *C. freundii* isolates showed resistance.

|            |                 | C  | CN            | CIP           | CL     | AZM           | TE            | AMP          | CRO           | COT    | FO     | F  | CTX           | CAZ | LEV |
|------------|-----------------|----|---------------|---------------|--------|---------------|---------------|--------------|---------------|--------|--------|----|---------------|-----|-----|
| <b>C</b>   | ρ               | .a | .a            |               |        |               |               |              |               |        |        |    |               |     |     |
|            | Sig. (2-tailed) |    | .             |               |        |               |               |              |               |        |        |    |               |     |     |
| <b>CN</b>  | ρ               | .a | 1             |               |        |               |               |              |               |        |        |    |               |     |     |
|            | Sig. (2-tailed) | .  | .             |               |        |               |               |              |               |        |        |    |               |     |     |
| <b>CIP</b> | ρ               | .a | <b>.749**</b> | 1             |        |               |               |              |               |        |        |    |               |     |     |
|            | Sig. (2-tailed) | .  | <b>0.000</b>  | .             |        |               |               |              |               |        |        |    |               |     |     |
| <b>CL</b>  | ρ               | .a | 0.115         | 0.153         | 1      |               |               |              |               |        |        |    |               |     |     |
|            | Sig. (2-tailed) | .  | 0.585         | 0.465         | .      |               |               |              |               |        |        |    |               |     |     |
| <b>AZM</b> | ρ               | .a | <b>.498*</b>  | <b>.665**</b> | 0.23   | 1             |               |              |               |        |        |    |               |     |     |
|            | Sig. (2-tailed) | .  | <b>0.011</b>  | <b>0.000</b>  | 0.268  | .             |               |              |               |        |        |    |               |     |     |
| <b>TE</b>  | ρ               | .a | <b>.634**</b> | <b>.846**</b> | 0.181  | <b>.786**</b> | 1             |              |               |        |        |    |               |     |     |
|            | Sig. (2-tailed) | .  | <b>0.001</b>  | <b>0.000</b>  | 0.387  | <b>0.000</b>  | .             |              |               |        |        |    |               |     |     |
| <b>AMP</b> | ρ               | .a | 0.316         | <b>.421*</b>  | -0.115 | <b>.445*</b>  | 0.309         | 1            |               |        |        |    |               |     |     |
|            | Sig. (2-tailed) | .  | 0.124         | <b>0.036</b>  | 0.585  | <b>0.026</b>  | 0.132         | .            |               |        |        |    |               |     |     |
| <b>CRO</b> | ρ               | .a | 0.081         | 0.236         | 0.075  | 0.327         | <b>.417*</b>  | 0.208        | 1             |        |        |    |               |     |     |
|            | Sig. (2-tailed) | .  | 0.701         | 0.256         | 0.72   | 0.11          | <b>0.038</b>  | 0.32         | .             |        |        |    |               |     |     |
| <b>COT</b> | ρ               | .a | <b>.688**</b> | <b>.919**</b> | 0.167  | <b>.724**</b> | <b>.921**</b> | <b>.459*</b> | <b>.452*</b>  | 1      |        |    |               |     |     |
|            | Sig. (2-tailed) | .  | <b>0.000</b>  | <b>0.000</b>  | 0.426  | <b>0.000</b>  | <b>0.000</b>  | <b>0.021</b> | <b>0.023</b>  | .      |        |    |               |     |     |
| <b>FO</b>  | ρ               | .a | -0.115        | -0.153        | 0.042  | 0.181         | -0.181        | 0.115        | -0.075        | -0.167 | 1      |    |               |     |     |
|            | Sig. (2-tailed) | .  | 0.585         | 0.465         | 0.843  | 0.387         | 0.387         | 0.585        | 0.72          | 0.426  | .      |    |               |     |     |
| <b>F</b>   | ρ               | .a | .a            | .a            | .a     | .a            | .a            | .a           | .a            | .a     | .a     | .a |               |     |     |
|            | Sig. (2-tailed) | .  | .             | .             | .      | .             | .             | .            | .             | .      | .      | .  |               |     |     |
| <b>CTX</b> | ρ               | .a | 0.187         | 0.25          | 0.102  | 0.04          | 0.161         | 0.281        | <b>.431*</b>  | 0.204  | -0.102 | .a | 1             |     |     |
|            | Sig. (2-tailed) | .  | 0.37          | 0.228         | 0.627  | 0.848         | 0.442         | 0.174        | <b>0.032</b>  | 0.328  | 0.627  | .  | .             |     |     |
| <b>CAZ</b> | ρ               | .a | 0.081         | 0.236         | 0.075  | 0.079         | 0.169         | 0.208        | <b>.621**</b> | 0.201  | -0.075 | .a | <b>.739**</b> | 1   |     |
|            | Sig. (2-tailed) | .  | 0.701         | 0.256         | 0.72   | 0.706         | 0.42          | 0.32         | <b>0.001</b>  | 0.335  | 0.72   | .  | <b>0.000</b>  | .   |     |

|     |                 |    |        |        |       |       |        |       |       |        |        |    |       |       |   |
|-----|-----------------|----|--------|--------|-------|-------|--------|-------|-------|--------|--------|----|-------|-------|---|
| LEV | q               | .a | .554** | .653** | 0.153 | .497* | .678** | 0.226 | 0.236 | .578** | -0.153 | .a | 0.25  | .492* | 1 |
|     | Sig. (2-tailed) | .  | 0.004  | 0.000  | 0.465 | 0.012 | 0.000  | 0.277 | 0.256 | 0.002  | 0.465  | .  | 0.228 | 0.012 | . |

Here, \*\* Correlation is significant at the 0.01 level (2-tailed); \* Correlation is significant at the 0.05 level (2-tailed); .aCannot be computed because at least one of the variables is constant; q = Pearson correlation coefficient; LEV = levofloxacin; CAZ = ceftazidime; CTX = cefotaxime; F = nitrofurantoin; FO = fosfomycin; COT = cotrimoxazole; CRO = ceftriaxone; AMP = ampicillin; TE = tetracycline; AZM = azithromycin; CL = Cephalexin; CIP = ciprofloxacin; CN = gentamycin; C = chloramphenicol.

**Supplementary Table S2.** Pearson correlation coefficients assessing correlation between pairs of antibiotic resistance genes in *C. freundii* isolates from cloacal swabs of ducks.

|                                |          | <i>bla</i> <sub>TEM-1</sub> | <i>bla</i> <sub>CMY-2</sub> | <i>bla</i> <sub>CMY-9</sub> | <i>bla</i> <sub>CTX-M-1</sub> | <i>bla</i> <sub>CTX-M-2</sub> | <i>bla</i> <sub>CTX-M-14</sub> | <i>bla</i> <sub>SHV-1</sub> | <i>sul1</i>   | <i>sul2</i> | <i>tetA</i> | <i>tetB</i> | <i>tetC</i> | <i>qnrA</i> | <i>qnrB</i> | <i>qnrS</i> | <i>aacc2</i> | <i>aacc4</i> |
|--------------------------------|----------|-----------------------------|-----------------------------|-----------------------------|-------------------------------|-------------------------------|--------------------------------|-----------------------------|---------------|-------------|-------------|-------------|-------------|-------------|-------------|-------------|--------------|--------------|
| <i>bla</i> <sub>TEM-1</sub>    | Q        | 1                           |                             |                             |                               |                               |                                |                             |               |             |             |             |             |             |             |             |              |              |
|                                | <i>p</i> |                             |                             |                             |                               |                               |                                |                             |               |             |             |             |             |             |             |             |              |              |
| <i>bla</i> <sub>CMY-2</sub>    | Q        | <b>.417*</b>                | 1                           |                             |                               |                               |                                |                             |               |             |             |             |             |             |             |             |              |              |
|                                | <i>p</i> | <b>0.038</b>                |                             |                             |                               |                               |                                |                             |               |             |             |             |             |             |             |             |              |              |
| <i>bla</i> <sub>CMY-9</sub>    | Q        | 0.109                       | 0.261                       | 1                           |                               |                               |                                |                             |               |             |             |             |             |             |             |             |              |              |
|                                | <i>p</i> | 0.604                       | 0.207                       |                             |                               |                               |                                |                             |               |             |             |             |             |             |             |             |              |              |
| <i>bla</i> <sub>CTX-M-1</sub>  | Q        | .b                          | .b                          | .b                          | .b                            |                               |                                |                             |               |             |             |             |             |             |             |             |              |              |
|                                | <i>p</i> | .                           | .                           | .                           |                               |                               |                                |                             |               |             |             |             |             |             |             |             |              |              |
| <i>bla</i> <sub>CTX-M-2</sub>  | Q        | .b                          | .b                          | .b                          | .b                            | .b                            |                                |                             |               |             |             |             |             |             |             |             |              |              |
|                                | <i>p</i> | .                           | .                           | .                           | .                             |                               |                                |                             |               |             |             |             |             |             |             |             |              |              |
| <i>bla</i> <sub>CTX-M-14</sub> | Q        | 0.185                       | <b>.443*</b>                | -0.147                      | .b                            | .b                            | 1                              |                             |               |             |             |             |             |             |             |             |              |              |
|                                | <i>p</i> | 0.377                       | <b>0.026</b>                | 0.482                       | .                             | .                             |                                |                             |               |             |             |             |             |             |             |             |              |              |
| <i>bla</i> <sub>SHV-1</sub>    | Q        | .b                          | .b                          | .b                          | .b                            | .b                            | .b                             | .b                          |               |             |             |             |             |             |             |             |              |              |
|                                | <i>p</i> | .                           | .                           | .                           | .                             | .                             | .                              |                             |               |             |             |             |             |             |             |             |              |              |
| <i>sul1</i>                    | Q        | 0.384                       | 0.277                       | -0.012                      | .b                            | .b                            | 0.08                           | .b                          | 1             |             |             |             |             |             |             |             |              |              |
|                                | <i>p</i> | 0.058                       | 0.179                       | 0.955                       | .                             | .                             | 0.704                          | .                           |               |             |             |             |             |             |             |             |              |              |
| <i>sul2</i>                    | Q        | 0.208                       | 0.309                       | -0.166                      | .b                            | .b                            | <b>.421*</b>                   | .b                          | <b>.540**</b> | 1           |             |             |             |             |             |             |              |              |
|                                | <i>p</i> | 0.32                        | 0.132                       | 0.429                       | .                             | .                             | <b>0.036</b>                   | .                           | <b>0.005</b>  |             |             |             |             |             |             |             |              |              |
| <i>tetA</i>                    | Q        | 0.253                       | 0.263                       | -0.202                      | .b                            | .b                            | 0.086                          | .b                          | <b>.487*</b>  | 0.217       | 1           |             |             |             |             |             |              |              |
|                                | <i>p</i> | 0.222                       | 0.205                       | 0.332                       | .                             | .                             | 0.684                          | .                           | <b>0.013</b>  | 0.298       |             |             |             |             |             |             |              |              |
| <i>tetB</i>                    | Q        | 0.075                       | 0.181                       | -0.06                       | .b                            | .b                            | <b>.408*</b>                   | .b                          | 0.196         | 0.363       | -0.14       | 1           |             |             |             |             |              |              |
|                                | <i>p</i> | 0.72                        | 0.387                       | 0.775                       | .                             | .                             | <b>0.043</b>                   | .                           | 0.347         | 0.074       | 0.504       |             |             |             |             |             |              |              |
| <i>tetC</i>                    | Q        | .b                          | .b                          | .b                          | .b                            | .b                            | .b                             | .b                          | .b            | .b          | .b          | .b          | .b          |             |             |             |              |              |
|                                | <i>p</i> | .                           | .                           | .                           | .                             | .                             | .                              | .                           | .             | .           | .           | .           | .           |             |             |             |              |              |

|       |   |        |        |        |    |    |        |    |        |        |        |        |    |        |        |       |    |   |
|-------|---|--------|--------|--------|----|----|--------|----|--------|--------|--------|--------|----|--------|--------|-------|----|---|
| qnrA  | q | 0.075  | 0.181  | -0.06  | .b | .b | .408*  | .b | -0.212 | -0.115 | 0.298  | -0.042 | .b | 1      |        |       |    |   |
|       | p | 0.72   | 0.387  | 0.775  | .  | .  | 0.043  | .  | 0.308  | 0.585  | 0.149  | 0.843  | .  |        |        |       |    |   |
| qnrB  | q | -0.242 | 0.079  | -0.109 | .b | .b | 0.123  | .b | -0.138 | 0.081  | 0.274  | -0.075 | .b | .553** | 1      |       |    |   |
|       | p | 0.243  | 0.706  | 0.604  | .  | .  | 0.558  | .  | 0.511  | 0.701  | 0.184  | 0.72   | .  | 0.004  |        |       |    |   |
| qnrS  | q | 0.075  | 0.181  | -0.06  | .b | .b | -0.102 | .b | 0.196  | -0.115 | 0.298  | -0.042 | .b | -0.042 | -0.075 | 1     |    |   |
|       | p | 0.72   | 0.387  | 0.775  | .  | .  | 0.627  | .  | 0.347  | 0.585  | 0.149  | 0.843  | .  | 0.843  | 0.72   |       |    |   |
| aacc2 | q | .b     | .b     | .b     | .b | .b | .b     | .b | .b     | .b     | .b     | .b     | .b | .b     | .b     | .b    | .b |   |
|       | p | .      | .      | .      | .  | .  | .      | .  | .      | .      | .      | .      | .  | .      | .      | .     | .  |   |
| aacc4 | q | 0.161  | -0.053 | -0.129 | .b | .b | -0.218 | .b | .419*  | 0.01   | .636** | -0.089 | .b | -0.089 | -0.161 | .468* | .b | 1 |
|       | p | 0.442  | 0.802  | 0.54   | .  | .  | 0.295  | .  | 0.037  | 0.961  | 0.001  | 0.672  | .  | 0.672  | 0.442  | 0.018 | .  |   |

Here, \*\*Correlation is significant at the 0.01 level (2-tailed); \*Correlation is significant at the 0.05 level (2-tailed); .bCannot be computed because at least one of the variables is constant; q = Pearson correlation coefficient; p = Significance (2-tailed)
